# Supplementary material for: Highly Electrically Conductive Nanocomposites Based on PolymerInfused Graphene Sponges
Source: PubMed Central journal article supplement — Sci Rep. 2014 Apr 11;4:4652. doi: 10.1038/srep04652 (PMC3983941; doi:10.1038/srep04652), 2014-04-11
Supplement: srep04652-s1.pdf [file srep04652-s1.pdf]

# Highly Electrically Conductive Nanocomposites Based on Polymer-Infused Graphene Sponges

Yuanqing Li,<sup>1,\*</sup> Yarjan Abdul Samad,<sup>1</sup> Kyriaki Polychronopoulou,<sup>2</sup> Saeed M. Alhassan,<sup>3</sup> and Kin Liao<sup>1</sup>.

<sup>1</sup>Department of Aerospace Engineering, Khalifa University of Science, Technology, & Research, Abu Dhabi 127788, UAE

<sup>2</sup>Department of Mechanical Engineering, Khalifa University of Science, Technology, & Research, Abu Dhabi 127788, UAE

<sup>3</sup>Department of Chemical Engineering, The Petroleum Institute, Abu Dhabi 2533, UAE

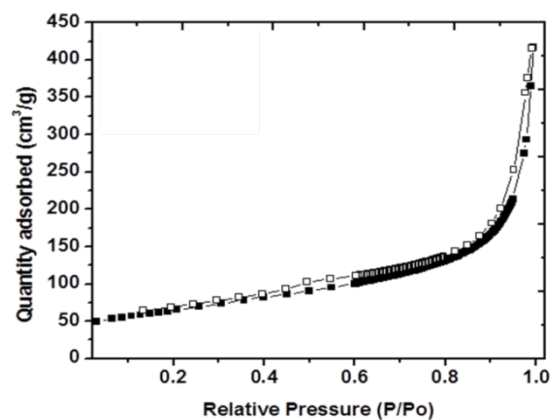

(a)

---

Corresponding author. Tel: +971-(0)2-5018418. E-mail: [yqli@mail.ipc.ac.cn](mailto:yqli@mail.ipc.ac.cn) (Y.Q. Li)

[kin.liao@kustar.ac.ae](mailto:kin.liao@kustar.ac.ae) (K. Liao).

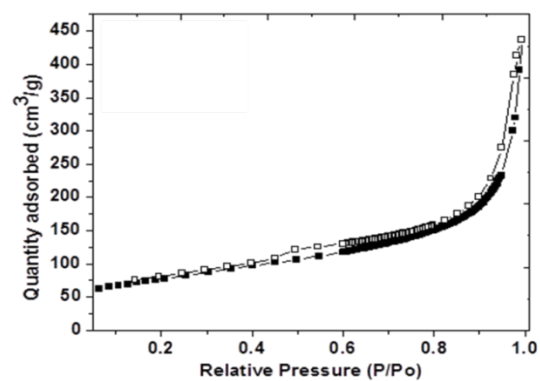

(b)

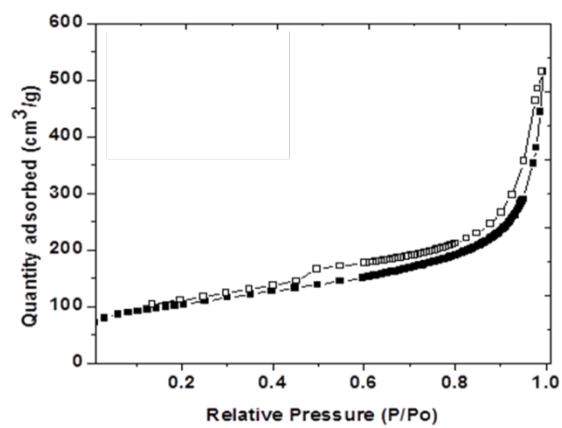

(c)

Figure S1 N<sub>2</sub> adsorption isotherm at 77 K of GS (a), GS-50(b), and GS-75(c).
